# Supplementary material for: Accelerated design for magnetic high entropy alloys using data-driven multi-objective optimization
Source: Royal Society of Chemistry journal article supplement (doi:10.1039/d2tc03922b), 2022-01-01
Supplement: d2tc03922b1.pdf [file d2tc03922b1.pdf]

## Supporting Information for

# Accelerated design for magnetic high entropy alloys using data-driven multi-objective optimization

Xin Li <sup>a,b</sup>, Guangcun Shan <sup>a,b,\*</sup>, Jiliang Zhang <sup>c</sup>, Chan-Hung Shek <sup>b,\*</sup>

<sup>a</sup> *School of Instrumentation Science and Opto-electronics Engineering, Beihang  
University, Beijing 100191, China*

<sup>b</sup> *Department of Materials Science and Engineering, City University of Hong  
Kong, Kowloon Tong, Hong Kong SAR, China*

<sup>c</sup> *Department of Materials Science and Engineering, Dalian Jiaotong University,  
Dalian 116028, China*

\* Corresponding author: [gcschan@buaa.edu.cn](mailto:gcschan@buaa.edu.cn) (G. Shan), [apchshek@cityu.edu.hk](mailto:apchshek@cityu.edu.hk)  
(C.H. Shek).

Table S1. Descriptive statistics of the target properties.

| Target | Count | Mean | STD  | Min | 25%  | 50%  | 75%   | Max   |
|--------|-------|------|------|-----|------|------|-------|-------|
| $M_s$  | 151   | 90.7 | 41.2 | 4.2 | 70.8 | 91.0 | 120.0 | 176.9 |
| $H$    | 279   | 403  | 197  | 110 | 198  | 418  | 556   | 850   |

Notes: Count is the total number of alloying compositions with experimental  $M_s$  and  $H$  data in the HEA dataset; Mean, STD Min and Max are the mean, standard deviation, minimum and maximum of  $M_s$  or  $H$ , respectively; 25%, 50% and 75% are the 25th, 50th, and 75th percentiles of  $M_s$  or  $H$ , respectively.

Table S2. The list of candidate features for the prediction of HEAs' magnetic or mechanical properties.

| Class                        | No.  | Description                                 | Formula                                                                                      |
|------------------------------|------|---------------------------------------------|----------------------------------------------------------------------------------------------|
| Chemical components          | 1-20 | Atomic percent of chemical elements ( $c$ ) | $c_i, i = \text{B, C, Al, Si, P, Ti, V, Cr, Mn, Fe, Co, Ni, Cu, Ga, Zr, Nb, Mo, Pd, Sn, Gd}$ |
|                              | 21   | Theoretical density ( $\rho$ )              | $100 / (\sum \frac{w_i}{\rho_i})$                                                            |
|                              | 22   | Mean metallic atomic radius ( $R_m$ )       | $\sum c_i r_i$                                                                               |
|                              | 23   | Atomic size difference ( $\delta_R$ )       | $\sqrt{\sum c_i (1 - \frac{r_i}{\bar{r}})^2}$                                                |
| Related to atomic structures | 24   | Theoretical molar volume ( $V_m$ )          | $V_m = \sum_{i=1}^n \frac{c_i m_i}{\rho_i}$                                                  |
| Related to thermodynamics    | 25   | Mixing entropy ( $\Delta S_{\text{mix}}$ )  | $\Delta S_{\text{mix}} = -R \sum c_i \ln c_i$                                                |

|                                  |    |                                                                           |                                                                                                                                 |
|----------------------------------|----|---------------------------------------------------------------------------|---------------------------------------------------------------------------------------------------------------------------------|
|                                  | 26 | Mixing enthalpy<br>( $\Delta H_{\text{mix}}$ )                            | $\Delta H_{\text{mix}} = \sum 4c_i c_j \Delta H_{AB}^{\text{mix}}, i \neq j$                                                    |
|                                  | 27 | $\Omega$                                                                  | $\frac{T_m \Delta S_{\text{mix}}}{ \Delta H_{\text{mix}} }$                                                                     |
|                                  | 28 | Mixing Gibbs free energy ( $\Delta G_{\text{mix}}$ )                      | $\Delta G_{\text{mix}} = \Delta H_{\text{mix}} - T_m \Delta S_{\text{mix}}$                                                     |
|                                  | 29 | Melting temperature calculated by the rule of mixtures ( $T_m$ )          | $T_m = \sum c_i (T_m)_i$                                                                                                        |
| Related to electronic properties | 30 | Pauling electronegativity ( $\chi$ )                                      | $\sum c_i \chi_i$                                                                                                               |
|                                  | 31 | Pauling electronegativity difference ( $\delta_\chi$ )                    | $\sqrt{\sum c_i \left(1 - \frac{\chi_i}{\bar{\chi}}\right)^2}$                                                                  |
|                                  | 32 | Relative Pauling electronegativity ( $R\chi$ )                            | $\sum c_i \chi_i - \sum c_k \chi_k, k = \text{Fe, Co, Ni, Gd}$                                                                  |
|                                  | 33 | Valence electron concentration ( $VEC$ )                                  | $\sum c_i VEC_i$                                                                                                                |
|                                  | 34 | Valence electron concentration difference ( $\delta_{VEC}$ )              | $\sqrt{\sum c_i \left(1 - \frac{VEC_i}{VEC}\right)^2}$                                                                          |
|                                  | 35 | Relative valence electron concentration ( $RVEC$ )                        | $\sum c_i VEC_i - \sum c_k VEC_k, k = \text{Fe, Co, Ni, Gd}$                                                                    |
|                                  | 36 | Work function ( $W$ )                                                     | $\sum c_i W_i$                                                                                                                  |
|                                  | 37 | Work function difference ( $\delta_w$ )                                   | $\sqrt{\sum c_i \left(1 - \frac{W_i}{\bar{W}}\right)^2}$                                                                        |
| Related to magnetism             | 38 | Average atomic moment of ferromagnetic components ( $\bar{\mu}$ )         | $c_{\text{Fe}} \mu_{\text{Fe}} + c_{\text{Co}} \mu_{\text{Co}} + c_{\text{Ni}} \mu_{\text{Ni}} + c_{\text{Gd}} \mu_{\text{Gd}}$ |
|                                  | 39 | Theoretical saturated magnetization of ferromagnetic components ( $B_s$ ) | $\frac{N_A \bar{\mu} \mu_B}{V_m}$                                                                                               |

Notes:  $w_i$ ,  $\rho_i$ ,  $r_i$ ,  $\chi_i$ ,  $VEC_i$ ,  $m_i$  and  $T_{mi}$  are atomic weight percentage, density, atomic radius, electronegativity, valence electron concentration, atomic weight and melting point of the  $i^{th}$  constituent element in each composition, respectively.  $R$  is the gas constant, and  $\Delta H_{AB}^{mix}$  is the mixing enthalpy of the liquid binary alloy containing  $i^{th}$  and  $j^{th}$  elements<sup>1</sup>. The average magnetic moment of Fe, Co and Ni atoms are  $\mu_{Fe} = 2.2\mu_B$ ,  $\mu_{Co} = 1.7\mu_B$  and  $\mu_{Ni} = 0.6\mu_B$ , respectively, where  $\mu_B$  is the Bohr magneton.

Table S3. Elemental properties used for feature calculation.

| Element | Atomic weight<br>(Da) | $\rho$<br>(g/cm <sup>3</sup> ) | $R_m$<br>(Å) | $T_m$<br>(K) | $\chi$ | $VEC$ | $W$  |
|---------|-----------------------|--------------------------------|--------------|--------------|--------|-------|------|
| Fe      | 55.8                  | 7.874                          | 1.241        | 1811         | 1.83   | 8     | 4.7  |
| Ni      | 58.7                  | 8.912                          | 1.246        | 1728         | 1.91   | 10    | 5.15 |
| Co      | 58.9                  | 8.860                          | 1.251        | 1768         | 1.88   | 9     | 5.00 |
| Al      | 27.0                  | 2.698                          | 1.432        | 933          | 1.61   | 3     | 4.28 |
| Cr      | 52.0                  | 7.150                          | 1.249        | 2180         | 1.66   | 6     | 4.50 |
| Cu      | 63.5                  | 8.960                          | 1.278        | 1358         | 1.9    | 11    | 4.65 |
| Mn      | 54.9                  | 7.440                          | 1.350        | 1519         | 1.55   | 7     | 4.10 |
| Si      | 28.1                  | 2.330                          | 1.153        | 1687         | 1.9    | 4     | 4.85 |
| V       | 50.9                  | 6.110                          | 1.316        | 2183         | 1.63   | 5     | 4.30 |
| B       | 10.8                  | 2.340                          | 0.820        | 2349         | 2.04   | 3     | 4.45 |
| Ti      | 47.9                  | 4.540                          | 1.462        | 1941         | 1.54   | 4     | 4.33 |
| Zr      | 91.2                  | 6.506                          | 1.603        | 2128         | 1.33   | 4     | 4.05 |
| C       | 12.0                  | 2.267                          | 0.773        | 4000         | 2.55   | 4     | 5.00 |
| P       | 31.0                  | 1.820                          | 1.060        | 317          | 2.19   | 5     | 0.00 |
| Ga      | 69.7                  | 5.907                          | 1.392        | 303          | 1.81   | 3     | 4.20 |
| Nb      | 92.9                  | 8.570                          | 1.429        | 2750         | 1.6    | 5     | 4.30 |
| Mo      | 96.0                  | 10.220                         | 1.363        | 2896         | 2.16   | 6     | 4.60 |
| Sn      | 118.7                 | 7.287                          | 1.620        | 505          | 1.96   | 4     | 4.42 |
| Pd      | 106.4                 | 12.020                         | 1.375        | 1828         | 2.2    | 10    | 5.12 |
| Gd      | 157.3                 | 7.895                          | 1.801        | 1585         | 1.2    | 3     | 3.10 |

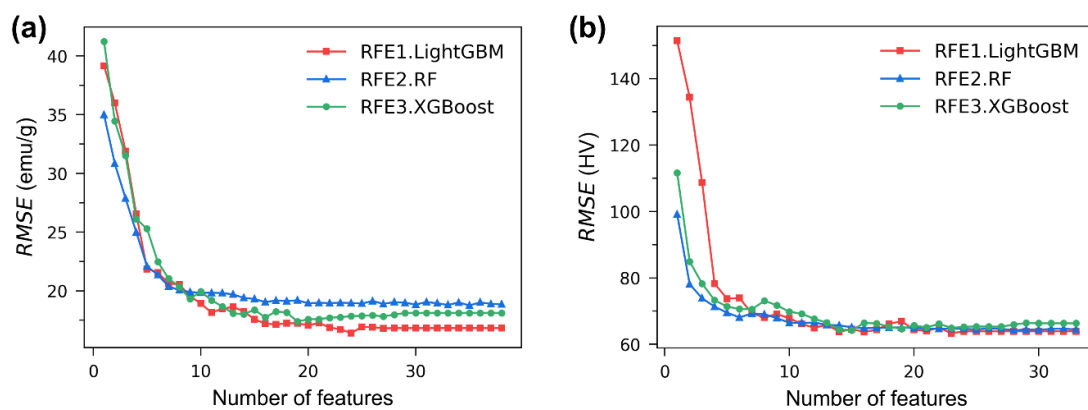

Fig. S1. Feature selection based on RFE with different cores for (a)  $M_s$  and (b)  $H$  prediction.

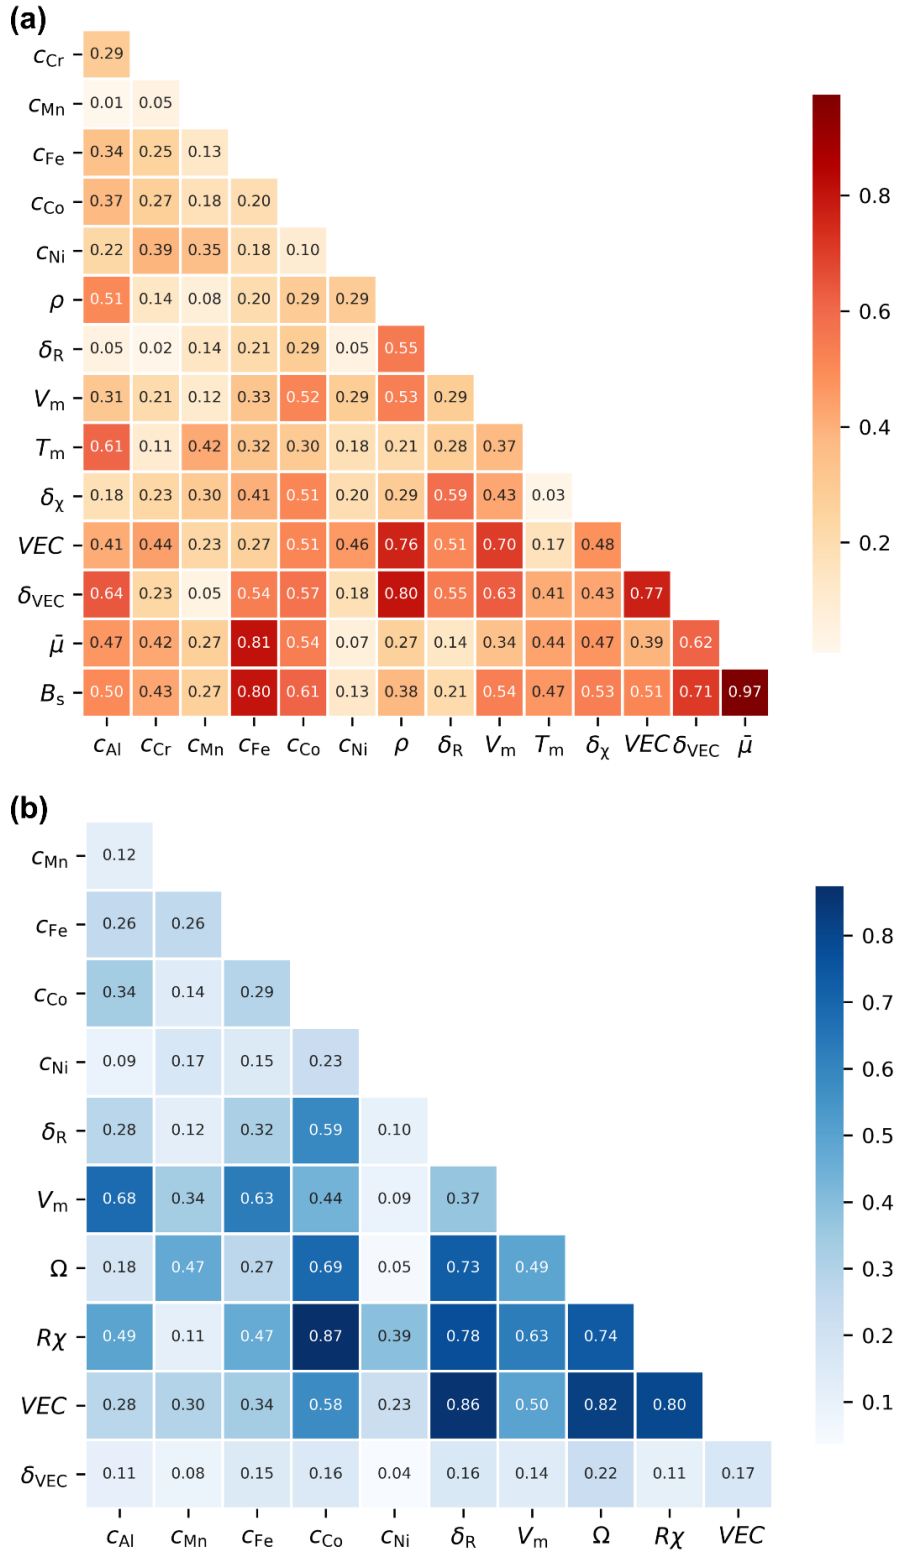

Fig. S2. The absolute PCC maps of the features selected by REF for (a)  $M_s$  and (b)  $H$  prediction.

Table S4. Alloying compositions suggested by the weighted-sum method for different  $\alpha/\beta$ .

| $\alpha/\beta$ | Composition (at.%) |    |    |    |    | $\hat{M}_s$ (emu/g) | $\hat{H}$ (HV) |
|----------------|--------------------|----|----|----|----|---------------------|----------------|
|                | Fe                 | Co | Ni | Al | Si |                     |                |
| 1.0            | 44                 | 25 | 7  | 16 | 8  | $144.2 \pm 8.4$     | $696 \pm 30$   |
| 1.1            | 44                 | 25 | 7  | 16 | 8  | $144.2 \pm 8.4$     | $696 \pm 30$   |
| 1.2            | 44                 | 25 | 7  | 16 | 8  | $144.2 \pm 8.4$     | $696 \pm 30$   |
| 1.3            | 43                 | 25 | 10 | 13 | 9  | $149.2 \pm 7.6$     | $667 \pm 32$   |
| 1.4            | 43                 | 25 | 10 | 13 | 9  | $149.2 \pm 7.6$     | $667 \pm 32$   |
| 1.5            | 43                 | 25 | 10 | 13 | 9  | $149.2 \pm 7.6$     | $667 \pm 32$   |
| 1.6            | 43                 | 25 | 10 | 13 | 9  | $149.2 \pm 7.6$     | $667 \pm 32$   |
| 1.7            | 43                 | 25 | 10 | 13 | 9  | $149.2 \pm 7.6$     | $667 \pm 32$   |
| 1.8            | 43                 | 25 | 10 | 13 | 9  | $149.2 \pm 7.6$     | $667 \pm 32$   |
| 1.9            | 43                 | 25 | 10 | 13 | 9  | $149.2 \pm 7.6$     | $667 \pm 32$   |
| 2.0            | 43                 | 25 | 10 | 13 | 9  | $149.2 \pm 7.6$     | $667 \pm 32$   |

Table S5. Pareto optimal set calculated by MOEA.

| No. | Composition (at.%) |    |    |    |    | $\hat{M}_s$ (emu/g) | $\hat{H}$ (HV) |
|-----|--------------------|----|----|----|----|---------------------|----------------|
|     | Fe                 | Co | Ni | Al | Si |                     |                |
| 1   | 35                 | 29 | 8  | 17 | 11 | $128.8 \pm 8.1$     | $707 \pm 39$   |
| 2   | 35                 | 29 | 7  | 18 | 11 | $124.2 \pm 8.1$     | $724 \pm 39$   |
| 3   | 37                 | 29 | 10 | 16 | 8  | $142.0 \pm 7.6$     | $664 \pm 34$   |
| 4*  | 37                 | 26 | 13 | 16 | 8  | $143.6 \pm 7.1$     | $658 \pm 33$   |
| 5   | 37                 | 29 | 9  | 17 | 8  | $139.4 \pm 7.9$     | $676 \pm 32$   |
| 6   | 37                 | 30 | 7  | 18 | 8  | $134.7 \pm 8.1$     | $695 \pm 34$   |
| 7   | 37                 | 29 | 8  | 16 | 10 | $137.1 \pm 8.2$     | $689 \pm 33$   |
| 8   | 38                 | 29 | 8  | 18 | 7  | $138.9 \pm 8.0$     | $688 \pm 33$   |
| 9   | 38                 | 29 | 7  | 16 | 10 | $137.1 \pm 8.3$     | $692 \pm 32$   |
| 10  | 49                 | 29 | 10 | 3  | 9  | $153.4 \pm 16.3$    | $431 \pm 39$   |
| 11* | 49                 | 22 | 11 | 9  | 9  | $148.8 \pm 10.1$    | $561 \pm 43$   |
| 12  | 49                 | 24 | 7  | 9  | 11 | $146.6 \pm 8.8$     | $652 \pm 35$   |
| 13* | 49                 | 23 | 8  | 9  | 11 | $147.3 \pm 8.8$     | $633 \pm 38$   |
| 14  | 50                 | 22 | 9  | 9  | 10 | $147.4 \pm 9.5$     | $602 \pm 42$   |

Note: “\*” represents the alloying compositions chosen for experimental validation.

Table S6. Compositions and properties of some reported Fe-Co-Ni-Al-Si magnetic HEAs.

| Composition                                                                                              | Fe<br>(at.%) | Co<br>(at.%) | Ni<br>(at.%) | Al<br>(a.t%) | Si<br>(at.%) | $M_s$<br>(emu/g) | $H$ (HV) | $\Delta S_{\text{mix}}$<br>( $\text{J}\cdot\text{K}^{-1}\cdot\text{mol}^{-1}$ ) | Phase(s)  |
|----------------------------------------------------------------------------------------------------------|--------------|--------------|--------------|--------------|--------------|------------------|----------|---------------------------------------------------------------------------------|-----------|
| $(\text{Fe}_{0.3}\text{Co}_{0.5}\text{Ni}_{0.2})_{1-x}(\text{Al}_{1/3}\text{Si}_{2/3})_x$ <sup>2</sup>   |              |              |              |              |              |                  |          |                                                                                 |           |
| $x = 0.05$                                                                                               | 28.5         | 47.5         | 19.0         | 1.7          | 3.3          | 153.5            | -        | 10.05                                                                           | FCC       |
| $x = 0.10$                                                                                               | 27.0         | 45.0         | 18.0         | 3.3          | 6.7          | 131.0            | -        | 10.94                                                                           | FCC       |
| $x = 0.15$                                                                                               | 25.5         | 42.5         | 17.0         | 5.0          | 10.0         | 117.1            | -        | 11.59                                                                           | BCC + FCC |
| $x = 0.25$                                                                                               | 22.5         | 37.5         | 15.0         | 8.3          | 16.7         | 116.5            | -        | 12.42                                                                           | BCC       |
| $\text{FeCoNi}(\text{AlSi})_x$ <sup>3</sup>                                                              |              |              |              |              |              |                  |          |                                                                                 |           |
| $x = 0.10$                                                                                               | 31.3         | 31.3         | 31.3         | 3.1          | 3.1          | 143.4            | 147      | 10.87                                                                           | FCC       |
| $x = 0.30$                                                                                               | 27.8         | 27.8         | 27.8         | 8.3          | 8.3          | 113.8            | 344      | 12.32                                                                           | FCC + BCC |
| $x = 0.50$                                                                                               | 25.0         | 25.0         | 25.0         | 12.5         | 12.5         | 107.1            | 644      | 12.97                                                                           | BCC       |
| $x = 0.70$                                                                                               | 22.7         | 22.7         | 22.7         | 15.9         | 15.9         | 78.3             | 771      | 13.26                                                                           | BCC       |
| $(\text{Fe}_{0.45}\text{Co}_{0.3}\text{Ni}_{0.25})_{1-x}(\text{Al}_{0.4}\text{Si}_{0.6})_x$ <sup>4</sup> |              |              |              |              |              |                  |          |                                                                                 |           |
| $x = 0.125$                                                                                              | 39.4         | 26.3         | 21.9         | 5.0          | 7.5          | 123.2            | 260      | 11.60                                                                           | BCC + FCC |
| $x = 0.15$                                                                                               | 38.3         | 25.5         | 21.3         | 6.0          | 9.0          | 125.8            | 345      | 11.90                                                                           | BCC + FCC |
| $x = 0.16$                                                                                               | 37.8         | 25.2         | 21.0         | 6.4          | 9.6          | 126.3            | 421      | 12.00                                                                           | BCC + FCC |
| $x = 0.17$                                                                                               | 37.4         | 24.9         | 20.8         | 6.8          | 10.2         | 132.8            | 494      | 12.11                                                                           | BCC + FCC |
| $x = 0.18$                                                                                               | 36.9         | 24.6         | 20.5         | 7.2          | 10.8         | 148.5            | 599      | 12.20                                                                           | BCC       |
| $x = 0.19$                                                                                               | 36.5         | 24.3         | 20.3         | 7.6          | 11.4         | 141.9            | 612      | 12.29                                                                           | BCC       |
| $x = 0.2$                                                                                                | 36.0         | 24.0         | 20.0         | 8.0          | 12.0         | 133.3            | 621      | 12.38                                                                           | BCC       |



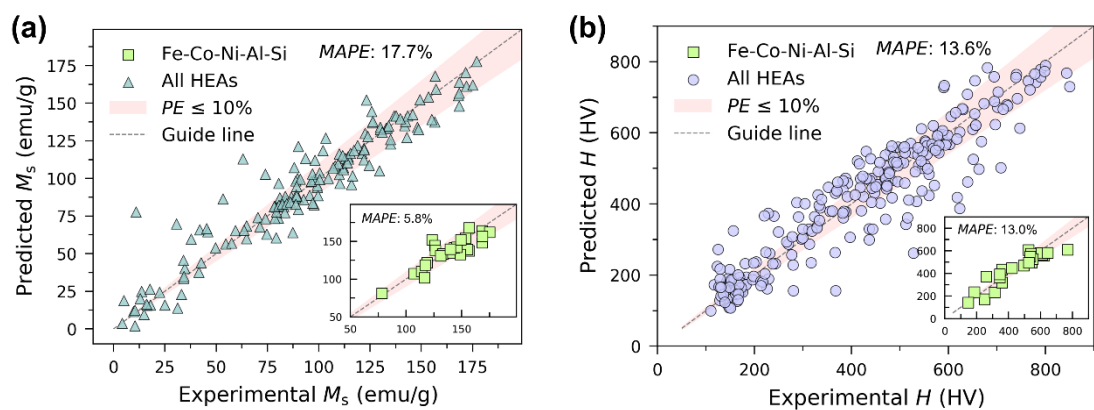

Fig. S3. Cross-validated predictions of (a)  $M_s$  via SVR and (b)  $H$  via LightGBM as compared against corresponding experimental values in the dataset after adding the experimental data of the newly synthesized HEAs.

## References

- 1 A. Takeuchi and A. Inoue, *Materials Transactions*, 2005, **46**, 2817–2829.
- 2 Y. Zhang, M. Zhang, D. Li, T. Zuo, K. Zhou, M. C. Gao, B. Sun and T. Shen, *Metals*, 2019, **9**, 382.
- 3 Z. Li, J. Qi, Z. Li, H. Li, H. Xu, G. Bai, X. Liu and X. Zhang, *Materials Letters*, 2021, **297**, 129965.
- 4 K. X. Zhou, B. R. Sun, G. Y. Liu, X. W. Li, S. W. Xin, P. K. Liaw and T. D. Shen, *Intermetallics*, 2020, **122**, 106801.
